# Supplementary material
Source: PubMed Central journal article supplement (PMC2737500)
Supplement: 97320630003440S1.pdf [file 97320630003440S1.pdf]

## Supplementary Material

**Table 1:** Predicted sub-cellular localization for various amyloid protein processing enzymes as well as its interacting partners.

|                     | Cyto | Extr | Pero | Plas | ER | Mito | Cyto-<br>pero | Lys | Gol | Nucl | Cyto-<br>Mito | Cyto-<br>Nucl |
|---------------------|------|------|------|------|----|------|---------------|-----|-----|------|---------------|---------------|
| Amyloid beta1-42    | 17   | 10   |      |      |    |      |               |     |     | 3    |               |               |
| Amyloid beta 1-40   | 17   | 12   |      |      |    |      |               |     |     |      |               |               |
| beta-APP            |      | 13   | 8.5  |      | 7  |      | 5             |     |     |      |               |               |
| Secretase BETA A    |      | 7    | 13   | 5    | 3  | 2    |               |     |     |      |               |               |
| Secretase BETA B    |      | 8    | 12   | 4    | 4  | 2    |               |     |     |      |               |               |
| Secretase BETA C    | 2    | 8    | 13   | 3    | 4  |      |               |     |     |      |               |               |
| Secretase BETA D    | 2    | 8    | 13   | 3    | 3  |      |               |     |     |      |               |               |
| Presenilin 1        |      |      |      | 31   |    |      |               |     |     |      |               |               |
| Apo E               |      | 25   |      |      | 2  | 3    |               |     |     |      |               |               |
| TGF beta            |      | 8    | 3    |      |    | 14   |               | 5   |     |      | 8.8           |               |
| AchE precursor      |      | 18   | 8    |      |    |      |               |     | 3   |      |               |               |
| GAPDH               | 28   |      |      |      |    | 2    |               |     |     |      |               |               |
| Caspase 3 Precursor | 19   | 6    |      |      | 3  |      |               |     |     | 2    |               |               |
| Cathepsin beta      |      | 25   |      |      |    |      |               | 7   |     |      |               |               |
| Insulin protease    | 7.5  |      |      |      |    | 21   |               |     |     |      | 5.5           |               |
| Cyclophilin D       | 23   |      |      |      |    | 5    |               |     |     |      |               | 13.5          |
| ANT                 | 12   |      |      |      | 3  | 15   |               |     |     |      |               |               |

**Table 2:** List of APP interacting proteins

| Protein STITCH database                                                         | NCBI-ID      | STITCH score |
|---------------------------------------------------------------------------------|--------------|--------------|
| PSEN1 (Presenilin-1) (467 aa)                                                   | AAH11729     | 0.999        |
| APOE (Apolipoprotein E precursor) (317 aa)                                      | EAW57306     | 0.999        |
| BACE1 (Beta-secretase 1 precursor) (531 aa)                                     | NP_036236    | 0.998        |
| LRP1 (Low-density lipoprotein receptor-related protein 1 precursor) (4544 aa)   | NP_002323    | 0.998        |
| BACE2 (Beta secretase 2 precursor) (518 aa)                                     | AAQ89286     | 0.992        |
| HADH2 (ABAD, 3-hydroxyacyl-CoA dehydrogenase type) (261 aa)                     | NP_001032900 | 0.988        |
| TGFB1 (Transforming growth factor beta 1 precursor) (390 aa)                    | NP_000651    | 0.988        |
| PSEN2 (Presenilin-2) (448 aa)                                                   | AAH06365     | 0.98         |
| ACHE (Acetylcholinesterase precursor) (641 aa)                                  | AAC60618     | 0.973        |
| LRP1B (Low-density lipoprotein receptor-related protein 1B precursor) (4599 aa) | NP_061027    | 0.971        |
| ENSP00000229239 (Glyceraldehyde-3-phosphate dehydrogenase) (335 aa)             | NP_002037    | 0.938        |
| NCSTN (Nicastrin precursor) (709 aa)                                            | CAI15009     | 0.934        |
| CASP3 (Caspase-3 precursor) (277 aa)                                            | CAC88866     | 0.929        |
| IDE (Insulin-degrading enzyme) (Insulin protease) (1019 aa)                     | CAI13670     | 0.927        |
| IL6 (Interleukin-6 precursor) (212 aa)                                          | CAG29292     | 0.918        |
| MAPT (Microtubule-associated protein tau) (758 aa)                              | CAG26750     | 0.918        |
| HMOX2 (Heme oxygenase 2) (316 aa)                                               | CAG46638     | 0.915        |
| CTSD (Cathepsin D precursor) (412 aa)                                           | CAG33228     | 0.914        |
